# Supplementary material
Source: publisher site journal article supplement (https://www.dovepress.com/article/416292)
Supplement: Supplementary file 1 [file get_supplementary_file.php]

**Impact of exacerbation history on dupilumab efficacy in children with uncontrolled moderate-to-severe asthma: LIBERTY ASTHMA VOYAGE study**

# Theresa W Guilbert; Alberto Tolcachier; Alessandro G Fiocchi; Constance H Katelaris; Wanda Phipatanakul; Philippe Begin; Ines de Mir; Arman Altincatal; Rebecca Gall; Olivier Ledanois; Amr Radwan; Juby A Jacob-Nara; Yamo Deniz; Paul J Rowe

# SUPPLEMENTARY INFORMATION

**Supplementary Section 1: Institutional Review Board of the LIBERTY ASTHMA VOYAGE study**

Washington University School of Medicine, 660 S. Euclid Ave, Campus Box 8089, St. Louis, MO, 63110, US.

**Supplementary Section 2: List of participating investigators of the LIBERTY ASTHMA VOYAGE study by country**

**Argentina**: Alberto Tolcachier, Horacio Budani, Jorge F. Maspero, Miguel Bergna, Luis Gustavo Aguero

**Australia**: Constance Katelaris, Peter Sly, Philip Robinson, Andrew Tai

**Brazil**: Gilberto Fischer, Gustavo Wandalsen, Flavio Sano, Antonio Pastorino, Martti Antila,

Renato Stein, Marina Lima

**Canada**: Philippe Bégin, Jason Ohayon, Remi Gagnon

**Chile**: Mario Calvo, Carlos Quilodran, Patricia Diaz, Carlos Ubilla, Viviana Lezana, Sergio Vargas

**Colombia**: Gustavo Ordoñez, Jorge Mario Sánchez Caraballo

**Hungary**: Zita Bauer, Katalin H Nagy, István Laki, Zoltan Novak, Eva Gacs, Ildikó Kiss, Gabor Papp, Adrienne Nagy, Nóra Kovács

**Italy**: Giorgio Piacentini, Enrico Lombardi, Stefania Zanconato, Alessandro Giovanni Fiocchi, Salvatore Leonardi

**Lithuania**: Odilija Rudzeviciene, Jolanta Kudzyte, Rima Sabaliene, Migle Klimantaviciene,

Rita Sopiene

**Mexico**: Sandra Nora Gonzalez Diaz, Jorge de Jesus Pascual Torres, Ricardo Ramirez Terrones, Marco Hugo Sanchez-Bustillos, Carlos Hernandez Barraza

**Poland**: Iwona Stelmach, Ewa Springer, Grzegorz Gaszczyk

**Romania**: Mihai Craiu

**Russia**: Anna Galustyan, Anna Nezabudkina, Tatiana Pak, Olga Perminova, Andrey Kamaev, Elena Vishneva

**South Africa**: Christiaan Scott, Jan Vermeulen

**Spain**: Ines de Mir, José Moure González, Miguel Tortajada Girbes, Lorena Comeche, Maria Cols Roig

**Turkey**: Bulent Enis Sekerel, Haluk Cokugras, Zeynep Tamay, Bulent Karadag, Derya Ufukaltintas, Nihat Sapan, Figen Gülen, Arzu Bakirtas

**Ukraine**: Levgeniya Stepanova, Yuriy Reznychenko, Svitlana Nedelska, Svitlana Ilchenko, Valentyn Polyakov, Leonid Bezrukov, Tetyana Lytvynova, Tamara Berezna

**United** **States of America**: Lawrence Sher, Neal Jain, Joseph Diaz, Roopen Patel, Leonard B. Bacharier, Jeffrey Stokes, Allison Ramsey, Sandy R. Durrani, Michael Daines, Rachel Miller, Joyce Yu, Georgiana Sanders, Todd Mahr, Jason Lang, Vinay Mehta, Sherry Farzan, Jeremy Cole, Maxcie Sikora, Christopher Chang, Lee Clore
